# Supplementary material for: Unraveling the intramolecular cyclization mechanism of oxidized tryptophan in aqueous solution as a function of pH
Source: Royal Society of Chemistry journal article supplement (doi:10.1039/c5ob01193k), 2015-01-01
Supplement: c5ob01193k1.pdf [file c5ob01193k1.pdf]

## Supporting Information

### Unravelling the intramolecular cyclization mechanism of oxidized tryptophan in aqueous solution as a function of pH

*Jefferson Méndez-Hurtado<sup>a</sup>, Ramón López<sup>a</sup>, M. Isabel Menéndez<sup>a\*</sup>, Manuel F. Ruiz-López<sup>b\*</sup>*

<sup>a</sup>Departamento de Química Física y Analítica. Universidad de Oviedo. C/ Julián Clavería 8, 33006 Oviedo. Spain. E-mail: [isabel@uniovi.es](mailto:isabel@uniovi.es). Fax: +34-985103125

<sup>b</sup>Theoretical Chemistry and Biochemistry group, SRSMC, Nancy-University. CNRS, BP 239, 54506 Vandoeuvre-lès-Nancy Cedex, France. E-mail: [Manuel.Ruiz@univ-lorraine.fr](mailto:Manuel.Ruiz@univ-lorraine.fr). Fax: +33-383684371

Figure S1. Page 2

Figure S2. Page 3

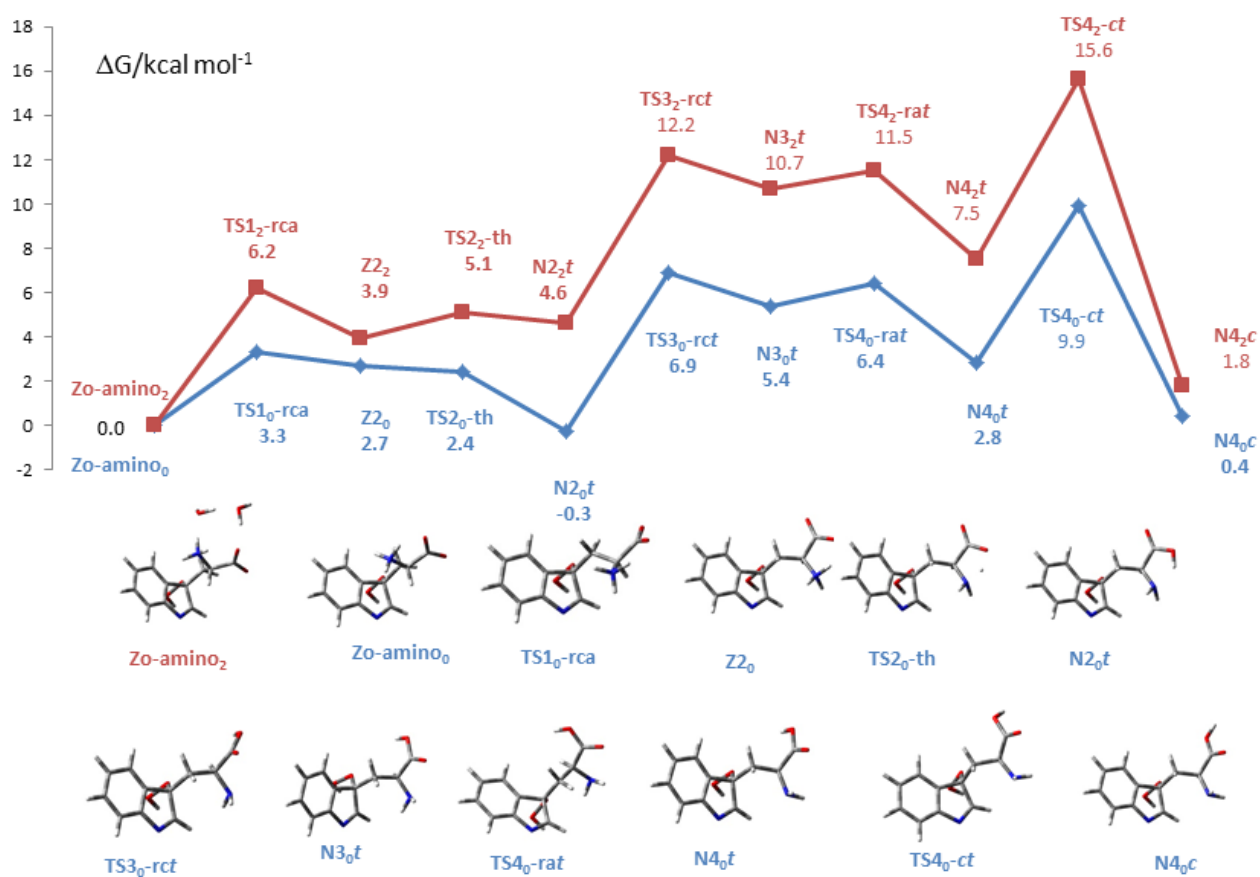

Figure S1. Gibbs energy profiles for the initial proton transfer from the ammonium to the carboxylate group, and conformational rearrangements to arrive at the neutral Trp-OOH conformer ready to undergo cyclization along the C-route considering zero and two explicit water molecules.

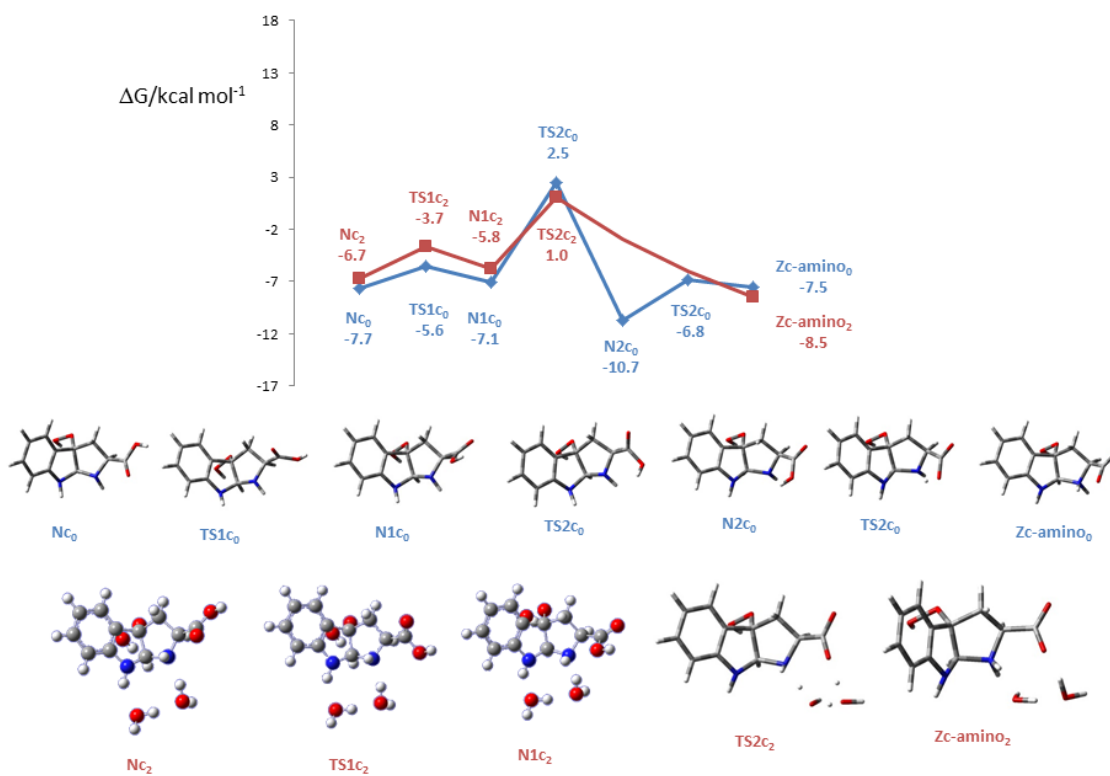

Figure S2. Gibbs energy profiles for the routes from **N2** to **Zc-amino** considering zero and two explicit water molecules
